# Supplementary material
Source: ML conference proceedings conference paper supplement (https://proceedings.neurips.cc/paper_files/paper/2011/hash/4fac9ba115140ac4f1c22da82aa0bc7f-Abstract.html)
Supplement: Supplementary file [file 4fac9ba115140ac4f1c22da82aa0bc7f-Supplemental.zip]

## A Generalised inverse Gaussian distribution

The generalised inverse Gaussian distribution is defined as follows:

$$x \sim \mathcal{N}^{-1}(\omega, \chi, \phi) = \frac{\chi^{-\omega}(\sqrt{\chi\phi})^\omega}{2K_\omega(\sqrt{\chi\phi})} x^{\omega-1} e^{-\frac{1}{2}(\chi x^{-1} + \phi x)}, \quad (1)$$

where  $x > 0$  and  $K_\omega(\cdot)$  is the modified Bessel function of the second kind with index  $\omega \in \mathbb{R}$ . Depending on the value taken by  $\omega$ , we have the following constraints on  $\chi$  and  $\phi$ :

$$\begin{cases} \omega > 0 : & \chi \geq 0, \phi > 0, \\ \omega = 0 : & \chi > 0, \phi > 0, \\ \omega < 0 : & \chi > 0, \phi \geq 0. \end{cases}$$

The following expectations are useful [?]:

$$\langle x \rangle = \sqrt{\frac{\chi}{\phi}} R_\omega(\sqrt{\chi\phi}), \quad \langle x^{-1} \rangle = \sqrt{\frac{\phi}{\chi}} R_{-\omega}(\sqrt{\chi\phi}), \quad \langle \ln x \rangle = \ln \sqrt{\frac{\chi}{\phi}} + \frac{d \ln K_\omega(\sqrt{\chi\phi})}{d\omega}, \quad (2)$$

where  $R_\omega(\cdot) \equiv K_{\omega+1}(\cdot)/K_\omega(\cdot)$

When  $\chi = 0$  and  $\omega > 0$ , the generalised inverse Gaussian distribution reduces to the Gamma distribution  $x \sim \mathcal{G}(a, b) = \frac{b^a}{\Gamma(a)} x^{a-1} e^{-bx}$ , where  $a, b > 0$  and  $\Gamma(\cdot)$  is the (complete) gamma function. The expectations (2) take the following simplified forms:

$$\langle x \rangle = \frac{a}{b}, \quad \langle x^{-1} \rangle = \begin{cases} \frac{b}{a-1} & a \geq 1 \\ \infty & a < 1 \end{cases}, \quad \langle \ln x \rangle = \psi(a) - \ln b, \quad (3)$$

where  $\psi(\cdot) = \ln \Gamma(\cdot)'$  is the digamma function.

When  $\phi = 0$  and  $\omega < 0$ , the generalised inverse Gaussian distribution reduces to the inverse Gamma distribution  $x \sim \mathcal{IG}(a, b) = \frac{b^a}{\Gamma(a)} x^{-a-1} e^{-\frac{b}{x}}$ , where  $a > 0$  and  $b > 0$ . The expectations (2) take the following simplified forms:

$$\langle x \rangle = \begin{cases} \frac{b}{a-1} & a \geq 1 \\ \infty & a < 1 \end{cases}, \quad \langle x^{-1} \rangle = \frac{a}{b}, \quad \langle \ln x \rangle = \ln b - \psi(a). \quad (4)$$

## B Truncated Gaussian density

The (positive/negative) truncated Gaussian density is defined as  $\mathcal{N}_\pm(\mu, \sigma^2) = \Phi(\pm\mu/\sigma)^{-1} \mathcal{N}(\mu, \sigma^2)$ , where  $\Phi(a) = \int_{-\infty}^a \mathcal{N}(0, 1) dz$  is the cumulative density of the unit Gaussian.

Let  $x_\pm \sim \mathcal{N}_\pm(\mu, \sigma^2)$ . The mean and variance are given by

$$\langle x_\pm \rangle = \mu \pm \sigma^2 \mathcal{N}_\pm(0|\mu, \sigma^2), \quad (5)$$

$$\langle (x_\pm - \langle x_\pm \rangle)^2 \rangle = \sigma^2 \mp \sigma^2 \mu \mathcal{N}_\pm(0|\mu, \sigma^2) - \sigma^4 \mathcal{N}_\pm(0|\mu, \sigma^2)^2. \quad (6)$$

## C Posterior parameters

Let  $\mathbf{X} \in \mathbb{R}^{D \times N}$  and  $\mathbf{Y} \in \mathbb{R}^{P \times N}$ . The parameters of the matrix-variate posteriors in (??) are given by

$$\mathbf{M}_W = (\tau^{-1} \langle \mathbf{V} \rangle \langle \mathbf{Z} \rangle \langle \mathbf{\Omega}^{-1} \rangle \langle \mathbf{\Gamma} \rangle + \sigma^{-2} \mathbf{Y} \mathbf{X}^\top) \mathbf{\Omega}_W, \quad \mathbf{S}_W = \mathbf{I}_P \quad (7)$$

$$\mathbf{\Omega}_W = (\tau^{-1} \langle \mathbf{\Omega}^{-1} \rangle \langle \mathbf{\Gamma} \rangle + \sigma^{-2} \mathbf{X} \mathbf{X}^\top)^{-1},$$

$$\mathbf{M}_{Z_i} = \tau^{-1} \mathbf{S}_{Z_i} \langle \mathbf{V}^\top \rangle \langle \mathbf{W}_i \rangle, \quad \mathbf{S}_{Z_i} = (\tau^{-1} \langle \mathbf{V}^\top \mathbf{V} \rangle + \mathbf{I}_K)^{-1}, \quad (8)$$

$$\mathbf{\Omega}_{Z_i} = \langle \gamma_i \rangle^{-1} \langle \mathbf{\Omega}_i^{-1} \rangle^{-1},$$

$$\mathbf{M}_V = \langle \mathbf{W} \rangle \langle \mathbf{\Omega}^{-1} \rangle \langle \mathbf{\Gamma} \rangle \langle \mathbf{Z}^\top \rangle \mathbf{\Omega}_V, \quad \mathbf{S}_V = \tau \mathbf{I}_P, \quad (9)$$

$$\mathbf{\Omega}_V = (\sum_i \langle \gamma_i \mathbf{Z}_i \mathbf{\Omega}_i^{-1} \mathbf{Z}_i^\top \rangle + \mathbf{I}_K)^{-1}.$$

where  $\langle \mathbf{\Omega}_i^{-1} \rangle = (D_i + v_i - 1) \mathbf{\Lambda}_i^{-1}$ .

The posterior parameters of the inverse Wishart are given by  $v_i = v + P + K$  and  $\mathbf{\Lambda}_i = \tau^{-1} \langle \gamma_i (\mathbf{W}_i - \mathbf{V} \mathbf{Z}_i)^\top (\mathbf{W}_i - \mathbf{V} \mathbf{Z}_i) \rangle + \langle \gamma_i \mathbf{Z}_i^\top \mathbf{Z}_i \rangle + \lambda \mathbf{I}_{D_i}$ .

Finally, the posterior parameters of the generalised inversed Gaussian are given by  $\omega_i = \omega + \frac{(P+K)D_i}{2}$ ,  $\chi_i = \chi$  and  $\phi_i = \phi + \tau^{-1} \text{tr} \langle (\mathbf{W}_i - \mathbf{V} \mathbf{Z}_i) \mathbf{\Omega}_i^{-1} (\mathbf{W}_i - \mathbf{V} \mathbf{Z}_i)^\top \rangle + \text{tr} \langle \mathbf{Z}_i \mathbf{\Omega}_i^{-1} \mathbf{Z}_i^\top \rangle$ .

## D Variational bound

The variational free energy is an upper bound to the marginal log-likelihood  $\ln p(\mathcal{D}|\vartheta)$  [?]. The variational bound for sparse multiple classification model defined in (??) and (??) is given by

$$\begin{aligned} \mathcal{F}_q(\mathcal{D}, \mathcal{Z}, \vartheta) = & -\langle \ln p(\mathbf{T}|\mathbf{Y}) \rangle - \langle \ln p(\mathbf{Y}|\mathbf{X}, \mathbf{W}) \rangle - \langle \ln p(\mathbf{W}|\mathbf{Z}, \mathbf{\Omega}, \mathbf{\Gamma}) \rangle - \langle \ln p(\mathbf{Z}|\mathbf{\Omega}, \mathbf{\Gamma}) \rangle \\ & - \sum_i \langle \ln p(\mathbf{\Omega}_i) \rangle - \langle \ln p(\mathbf{V}) \rangle - \sum_i \langle \ln p(\gamma_i) \rangle + \langle \ln q(\mathbf{Y}) \rangle + \langle \ln q(\mathbf{W}) \rangle \\ & + \langle \ln q(\mathbf{Z}) \rangle + \sum_i \langle \ln q(\mathbf{\Omega}_i) \rangle + \langle \ln q(\mathbf{V}) \rangle + \sum_i \langle \ln q(\gamma_i) \rangle, \end{aligned}$$

where

$$\begin{aligned} \langle \ln p(\mathbf{T}|\mathbf{Y}) \rangle &= - \sum_n \sum_p \langle \ln I(t_{np} y_{np}) \rangle \\ \langle \ln p(\mathbf{Y}|\mathbf{X}, \mathbf{W}) \rangle &= - \frac{NP}{2} \ln 2\pi - \frac{NP}{2} \ln \sigma^2 - \frac{1}{2\sigma^2} \text{tr} \langle (\mathbf{Y} - \mathbf{W} \mathbf{X})^\top (\mathbf{Y} - \mathbf{W} \mathbf{X}) \rangle \\ \langle \ln p(\mathbf{W}|\mathbf{Z}, \mathbf{\Omega}, \mathbf{\Gamma}) \rangle &= - \frac{DP}{2} \ln 2\pi + \frac{P}{2} \langle \ln |\mathbf{\Gamma}| \rangle + \frac{P}{2} \langle \ln |\mathbf{\Omega}^{-1}| \rangle - \frac{DP}{2} \ln \tau \\ &\quad - \frac{1}{2\tau} \text{tr} \langle \mathbf{\Gamma} \mathbf{\Omega}^{-1} (\mathbf{W} - \mathbf{V} \mathbf{Z})^\top (\mathbf{W} - \mathbf{V} \mathbf{Z}) \rangle \\ \langle \ln p(\mathbf{Z}|\mathbf{\Omega}, \mathbf{\Gamma}) \rangle &= - \frac{DK}{2} \ln 2\pi + \frac{K}{2} \langle \ln |\mathbf{\Gamma}| \rangle + \frac{K}{2} \langle \ln |\mathbf{\Omega}^{-1}| \rangle - \frac{1}{2} \text{tr} \langle \mathbf{\Gamma} \mathbf{\Omega}^{-1} \mathbf{Z}^\top \mathbf{Z} \rangle \\ \sum_i \langle \ln p(\mathbf{\Omega}_i) \rangle &= - \frac{\sum_i D_i (v + D_i - 1)}{2} \ln 2 - \frac{\sum_i D_i (D_i - 1)}{4} \ln \pi - \sum_i \sum_{j=1}^{D_i} \ln \Gamma \left( \frac{v + D_i - j}{2} \right) \\ &\quad + \frac{\sum_i D_i (v + D_i - 1)}{2} \ln \lambda + \sum_i \frac{v + 2D_i}{2} \langle \ln |\mathbf{\Omega}_i^{-1}| \rangle - \frac{\lambda}{2} \sum_i \text{tr} \langle \mathbf{\Omega}_i^{-1} \rangle \\ \langle \ln p(\mathbf{V}) \rangle &= - \frac{PK}{2} \ln 2\pi - \frac{PK}{2} \ln \tau - \frac{1}{2\tau} \text{tr} \langle \mathbf{V}^\top \mathbf{V} \rangle \\ \sum_i \langle \ln p(\gamma_i) \rangle &= Q\omega \ln \sqrt{\frac{\phi}{\chi}} - Q \ln 2K_\omega(\sqrt{\chi\phi}) + (\omega - 1) \sum_i \langle \ln \gamma_i \rangle - \frac{1}{2} \sum_i (\chi \langle \gamma_i^{-1} \rangle + \phi \langle \gamma_i \rangle) \\ \langle \ln q(\mathbf{Y}) \rangle &= - \sum_n \sum_p \ln \Phi \left( \frac{t_{np} \nu_{np}}{\sigma} \right) - \frac{NP}{2} \ln 2\pi - \frac{NP}{2} \ln \sigma^2 - \frac{1}{2\sigma^2} \text{tr} \langle (\mathbf{Y} - \mathbf{\nu})^\top (\mathbf{Y} - \mathbf{\nu}) \rangle \\ \langle \ln q(\mathbf{W}) \rangle &= - \frac{DP}{2} \ln 2\pi e - \frac{P}{2} \ln |\mathbf{\Omega}_W| - \frac{D}{2} \ln |\mathbf{S}_W|, \\ \langle \ln q(\mathbf{Z}) \rangle &= - \frac{DK}{2} \ln 2\pi e - \frac{K}{2} \ln |\mathbf{\Omega}_Z| - \frac{D}{2} \ln |\mathbf{S}_Z|, \\ \sum_i \langle \ln q(\mathbf{\Omega}_i) \rangle &= - \frac{\sum_i D_i (v_i + D_i - 1)}{2} \ln 2 - \frac{\sum_i D_i (D_i - 1)}{4} \ln \pi - \sum_i \sum_{j=1}^{D_i} \ln \Gamma \left( \frac{v_i + D_i - j}{2} \right) \\ &\quad + \sum_i \frac{v_i + D_i - 1}{2} \ln |\mathbf{\Lambda}_i| + \sum_i \frac{v_i + 2D_i}{2} \langle \ln |\mathbf{\Omega}_i^{-1}| \rangle - \frac{1}{2} \sum_i \text{tr} \langle \mathbf{\Lambda}_i \mathbf{\Omega}_i^{-1} \rangle \\ \langle \ln q(\mathbf{V}) \rangle &= - \frac{PK}{2} \ln 2\pi e - \frac{P}{2} \ln |\mathbf{\Omega}_V| - \frac{K}{2} \ln |\mathbf{S}_V|, \\ \sum_i \langle \ln q(\gamma_i) \rangle &= \sum_i \omega_i \ln \sqrt{\frac{\phi_i}{\chi_i}} - \sum_i \ln 2K_{\omega_i}(\sqrt{\chi_i \phi_i}) + \sum_i (\omega_i - 1) \langle \ln \gamma_i \rangle \end{aligned}$$

$$-\frac{1}{2} \sum_i \left( \chi_i \langle \gamma_i^{-1} \rangle + \phi_i \langle \gamma_i \rangle \right).$$

The expectation  $\langle \ln |\mathbf{\Omega}_i^{-1}| \rangle$  can be computed as  $D_i \ln 2 + \ln |\mathbf{\Lambda}_i| + \sum_j \psi \left( \frac{D_i + v_i - j}{2} \right)$ .

In the case of sparse multiple regression model the bound takes a very similar, but simpler form  $\mathcal{F}_q(\mathcal{D}, \mathcal{Z}, \vartheta) = -\langle \ln p(\mathbf{Y}|\mathbf{X}, \mathbf{W}) \rangle - \langle \ln p(\mathbf{W}|\mathbf{Z}, \mathbf{\Omega}, \mathbf{\Gamma}) \rangle - \langle \ln p(\mathbf{Z}|\mathbf{\Omega}, \mathbf{\Gamma}) \rangle - \sum_i \langle \ln p(\mathbf{\Omega}_i) \rangle - \langle \ln p(\mathbf{V}) \rangle - \sum_i \langle \ln p(\gamma_i) \rangle + \langle \ln q(\mathbf{W}) \rangle + \langle \ln q(\mathbf{Z}) \rangle + \sum_i \langle \ln q(\mathbf{\Omega}_i) \rangle + \langle \ln q(\mathbf{V}) \rangle + \sum_i \langle \ln q(\gamma_i) \rangle$ .
